# Supplementary material
Source: HighWire-hosted journal article supplement (https://www.rcpjournals.org/highwire/filestream/12768/field_highwire_adjunct_files/9/S7._Sunflower_plot_of_D12_breathlessness_scores_versus_Amplitude_Questionnaire_breathlessness_severity_VAS_scores.pdf)
Supplement: S7._Sunflower_plot_of_D12_breathlessness_scores_versus_Amplitude_Questionnaire_breathlessness_severity_VAS_scores.pdf [file S7._Sunflower_plot_of_D12_breathlessness_scores_versus_Amplitude_Questionnaire_breathlessness_severity_VAS_scores.pdf]

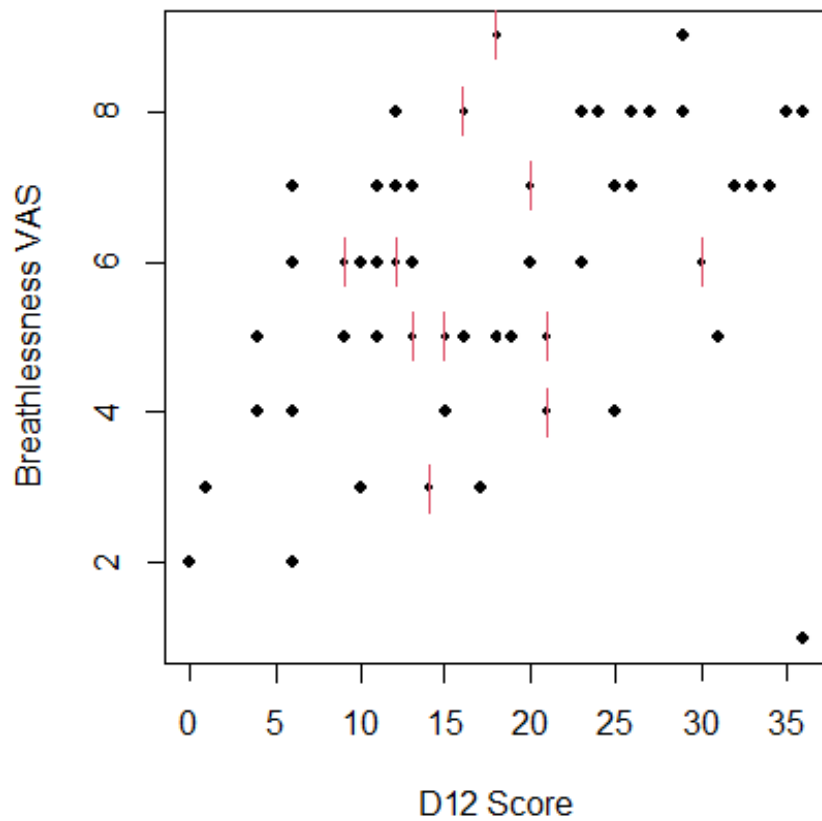

**S7. Sunflower plot of D12 Breathlessness scores versus Amplitude Questionnaire breathlessness severity VAS scores for those patients attending face-to-face review.**
